# Supplementary material for: The impact of sequencing depth on the inferred taxonomic composition and AMR gene content of metagenomic samples
Source: PubMed Central journal article supplement (PMC8204541; doi:10.1186/s40793-019-0347-1), 2019-10-24

## (a) Taxonomic composition compared to ground truth

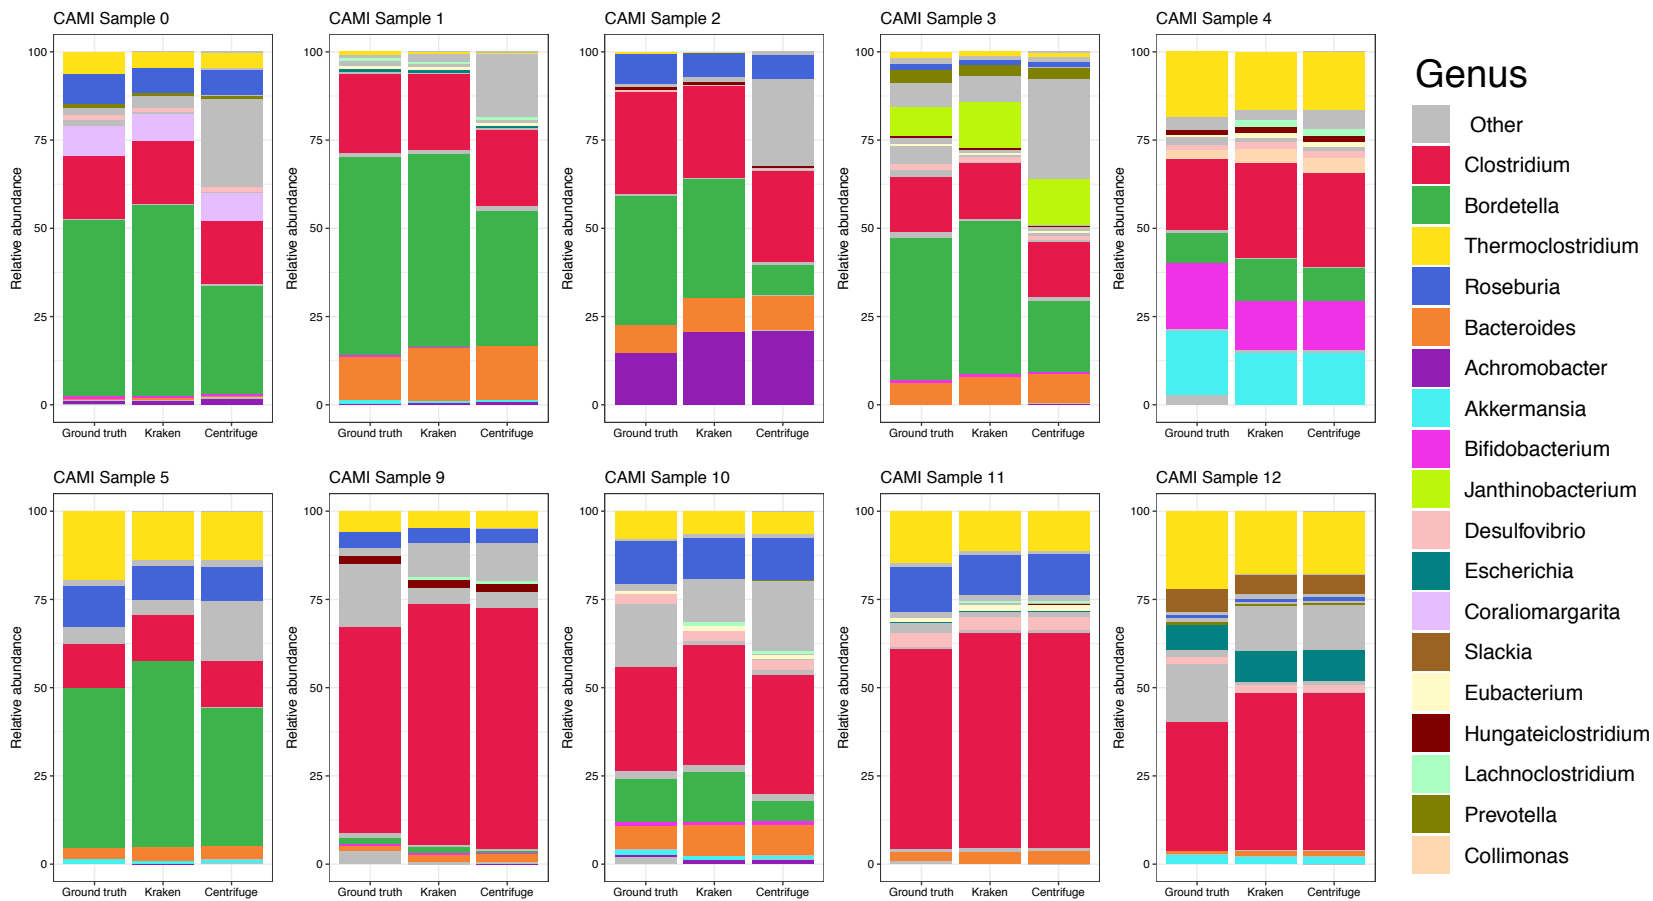

## (b) Relative species abundances compared to ground truth

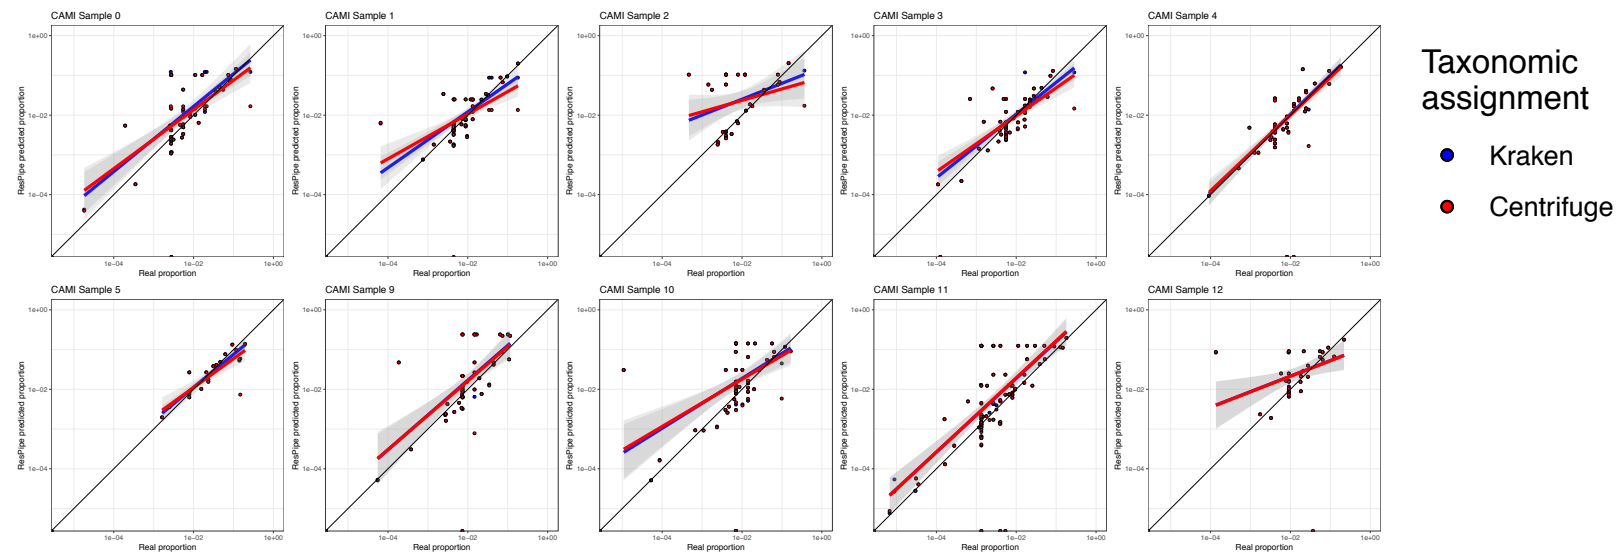

Supplement: 40793_2019_347_MOESM1_ESM.pdf [file 40793_2019_347_MOESM1_ESM.pdf]
